# Supplementary material
Source: publisher figshare collection journal article supplement (https://acs.figshare.com/ndownloader/files/3925258)
Supplement: Supplementary file 1 [file 3925258]

# Noise Phenomena Caused by Reversible Adsorption in Nanoscale Electrochemical Devices

---

Enno Kätelhön, Kay J. Krause, Klaus Mathwig, Serge G. Lemay, and Bernhard Wolfrum

## Supporting Material 1

Detailed parameter tables for all simulations.

- Figure 1b

|                                                      |                                |
|------------------------------------------------------|--------------------------------|
| Number of active molecules                           | 250                            |
| Spatial step width                                   | 5 nm                           |
| Diffusion constant                                   | $10^{-9} \text{ m}^2/\text{s}$ |
| Temporal step width                                  | 12.5 ns                        |
| Number of iterations                                 | $16 \cdot 10^8$                |
| Simulated time interval                              | 20 s                           |
| Sum over iterations                                  | 800                            |
| Sampling frequency                                   | 100 kHz                        |
| Ratio between the average adsorbed and desorbed time | 20                             |
| Number of traces averaged                            | 6                              |
  
- Figure 2b

|                            |                                           |
|----------------------------|-------------------------------------------|
| Number of active molecules | 200                                       |
| Spatial step width         | 5 nm                                      |
| Diffusion constant         | $6.7 \cdot 10^{-10} \text{ m}^2/\text{s}$ |
| Temporal step width        | 18.66 ns                                  |
| Number of iterations       | $107.2 \cdot 10^8$                        |
| Simulated time interval    | 200 s                                     |
| Sum over iterations        | 5360                                      |
| Sampling frequency         | 10 kHz                                    |
| Number of traces averaged  | 10                                        |
  
- Figure 2c/d

|                            |                                           |
|----------------------------|-------------------------------------------|
| Number of active molecules | 200                                       |
| Spatial step width         | 5 nm                                      |
| Diffusion constant         | $6.7 \cdot 10^{-10} \text{ m}^2/\text{s}$ |
| Temporal step width        | 18.66 ns                                  |
| Number of iterations       | $107.2 \cdot 10^8$                        |
| Simulated time interval    | 200 s                                     |

|                                                      |                                |
|------------------------------------------------------|--------------------------------|
| Sum over iterations                                  | 5360                           |
| Sampling frequency                                   | 10 kHz                         |
| Ratio between the average adsorbed and desorbed time | 3.37                           |
| Number of traces averaged                            | 10                             |
| • Figure 3c                                          |                                |
| Number of active molecules                           | 500                            |
| Spatial step width                                   | 10 nm                          |
| Diffusion constant                                   | $10^{-9} \text{ m}^2/\text{s}$ |
| Temporal step width                                  | 50 ns                          |
| Number of iterations                                 | $12 \cdot 10^8$                |
| Simulated time interval                              | 60 s                           |
| Sum over iterations                                  | 600                            |
| Sampling frequency                                   | 33.3 kHz                       |
| Ratio between the average adsorbed and desorbed time | 20                             |
| Number of traces averaged                            | 20                             |
| • Figure 3d                                          |                                |
| Number of active molecules                           | 500                            |
| Spatial step width                                   | 50 nm                          |
| Diffusion constant                                   | $10^{-9} \text{ m}^2/\text{s}$ |
| Temporal step width                                  | 1.25 s                         |
| Number of iterations                                 | $3.2 \cdot 10^8$               |
| Simulated time interval                              | 400 s                          |
| Sum over iterations                                  | 160                            |
| Sampling frequency                                   | 5 kHz                          |
| Ratio between the average adsorbed and desorbed time | 20                             |
| Number of traces averaged                            | 20                             |
